# Supplementary material
Source: publisher figshare collection journal article supplement (https://frontiersin.figshare.com/ndownloader/files/11160026)
Supplement: Supplementary file [file 11160026]

### *Supplementary Material*

## **Induction of type I interferons by therapeutic nanoparticle-based vaccination is indispensable to reinforce cytotoxic CD8<sup>+</sup> T cell responses during chronic retroviral infection**

Torben Knuschke<sup>1\*</sup>, Olga Rotan<sup>2</sup>, Wibke Bayer<sup>3</sup>, Sebastian Kollenda<sup>2</sup>, Julia Dickow<sup>3</sup>, Kathrin Sutter<sup>3</sup>, Wiebke Hansen<sup>1</sup>, Ulf Dittmer<sup>3</sup>, Karl S. Lang<sup>4</sup>, Matthias Eppe<sup>2</sup>, Jan Buer<sup>1</sup>, Astrid M. Westendorf<sup>1</sup>

\* **Correspondence:** Torben Knuschke: [torben.knuschke@uk-essen.de](mailto:torben.knuschke@uk-essen.de)

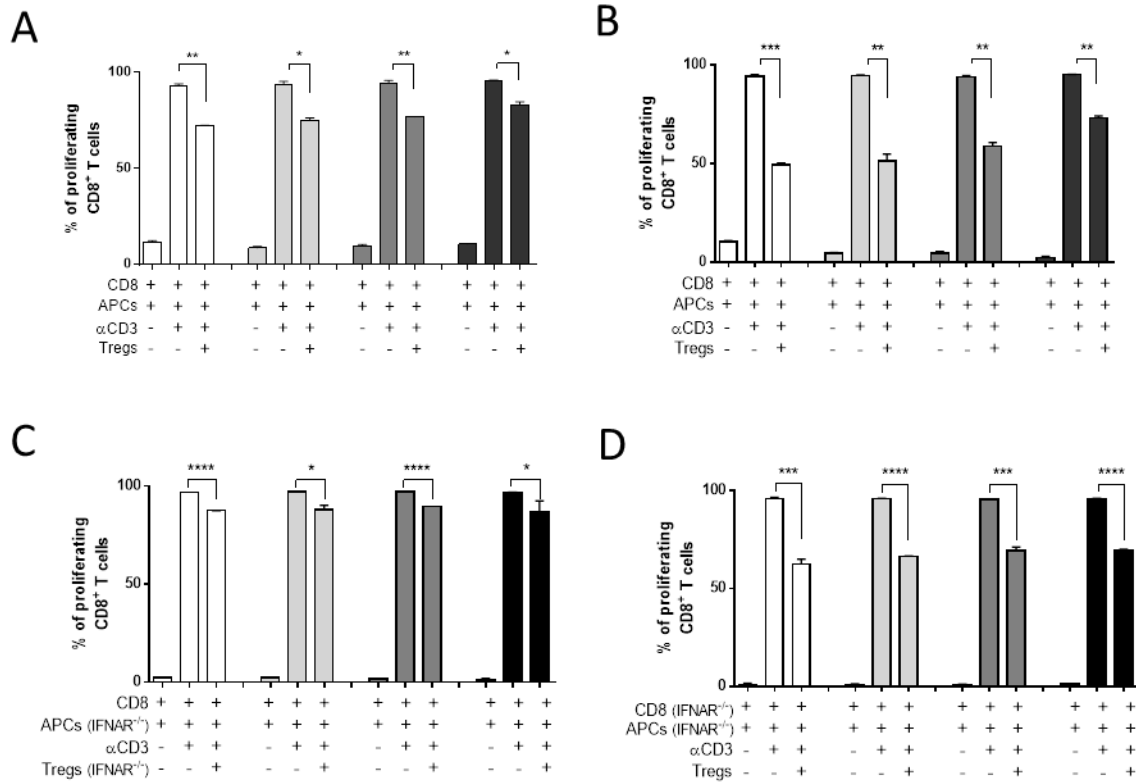

**Supplementary Figure 1.** Determination of the influence of IFN I on the suppressive capability of Tregs. Sorted CD4<sup>+</sup> Foxp3<sup>+</sup> (eGFP<sup>+</sup>) Treg cells from the spleen of naïve (A) or chronically FV infected (B) mice or CD4<sup>+</sup> CD25<sup>hi</sup> Treg cells from naïve IFNAR<sup>-/-</sup> mice (C) were co-cultured with CD8<sup>+</sup> responder T cells and irradiated antigen presenting cells (APCs) in the presence or absence of αCD3 and different amounts of universal IFNα. D) CD4<sup>+</sup> Foxp3<sup>+</sup> (eGFP<sup>+</sup>) Treg cells from naïve mice were co-cultured with CD8<sup>+</sup> responder T cells and irradiated APCs both isolated from IFNAR<sup>-/-</sup> mice in the presence or absence of αCD3 and different amounts of universal IFNα. Proliferation of CD8<sup>+</sup> T cells was measured by the loss of eFluor dye. The results of 2 independent experiments are shown. Bars represent mean ± SEM. Statistical analysis was performed by ANOVA with Bonferroni's multiple comparisons test (\*p<0.05; \*\*\*p<0.001; \*\*\*\*p<0.0001).

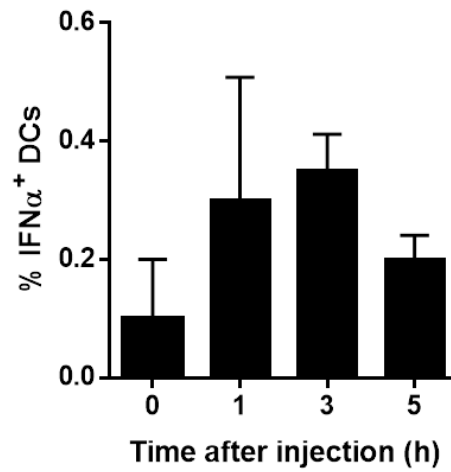

**Supplementary Figure 2:** IFN $\alpha$  is secreted by DCs *in vivo* after CaP nanoparticle vaccination. C57BL/6 mice were vaccinated subcutaneously with CpG and FV peptide functionalized CaP NPs. Afterwards, mice were sacrificed and CD11c<sup>+</sup> F4/80<sup>-</sup> cells from the popliteal lymph node were stained for IFN $\alpha$  after incubation in the presence of brefeldin A. The results of 2 independent experiments are depicted. n = 4. Data represent mean  $\pm$  SEM.
